# Supplementary material for: Widespread coral bleaching across subtropical and temperate Japan under record marine heat stress
Source: Research Square preprint supplement (doi:10.21203/rs.3.rs-8487461/v1), 2026-01-20
Supplement: Supplementary file 1 [file 82ca14eb1a0bdc5bf3a73870.docx]

**Supplemental material**

**Table S1** Temporal changes in MMM temperature at eight studied sites. P-values were calculate using Pearson’s correlation. Bold indicates statistical significance (p <0.05)

| **Site** | **R** | **df** | **t** | **p** |
| --- | --- | --- | --- | --- |
| Ishigaki | 0.44 | 41 | 3.17 | **0.002** |
| Okinawa | 0.42 | 41 | 2.96 | **0.005** |
| Tatsukushi | 0.57 | 41 | 4.46 | **<0.0001** |
| Kushimoto | 0.52 | 41 | 3.93 | **0.0003** |
| Tsushima | 0.33 | 41 | 2.31 | **0.02** |
| Tagojima | 0.49 | 41 | 3.67 | **0.0006** |
| Numazu | 0.49 | 41 | 3.61 | **0.0008** |
| Tateyama | 0.71 | 41 | 6.48 | **<0.0001** |
